# Supplementary material for: Doublecortin May Play a Role in Defining Chondrocyte Phenotype
Source: Int J Mol Sci. 2014 Apr 22;15(4):6941–60. doi: 10.3390/ijms15046941 (PMC4013671; doi:10.3390/ijms15046941)
Supplement: Supplementary file 1 [file ijms-15-06941-s001.pdf]

# Supplementary Information

**Table S1.** Differential gene expression between the proximal and distal regions of E12.5 mouse handplate.

| No. | Gene ID   | Gene Symbol          | Proximal/Distal<br>Ratio of Expression | Gene Name                                                      | Function                                                                                                        |
|-----|-----------|----------------------|----------------------------------------|----------------------------------------------------------------|-----------------------------------------------------------------------------------------------------------------|
| 1   | 17883     | <i>Myh3</i>          | 69.53                                  | <i>Myosin, heavy polypeptide 3, skeletal muscle, embryonic</i> | Associated with arthrogryposis syndromes, Freeman-Sheldon syndrome and Sheldon-Hall syndrome                    |
| 2   | 21955     | <i>Tnnt1</i>         | 33.21                                  | <i>Troponin T1, skeletal, slow</i>                             | Tropomyosin-binding subunit                                                                                     |
| 3   | 21924     | <i>Tnnc1</i>         | 31.61                                  | <i>Troponin C, cardiac/slow skeletal</i>                       | Central regulatory protein of striated muscle contraction                                                       |
| 4   | 17896     | <i>Myl4</i>          | 23.24                                  | <i>Myosin, light polypeptide 4</i>                             | Regulatory light chain of myosin                                                                                |
| 5   | 11472     | <i>Actn2</i>         | 14.71                                  | <i>Actinin alpha 2</i>                                         | F-actin cross-linking protein                                                                                   |
| 6   | 17885     | <i>Myh8</i>          | 12.62                                  | <i>Myosin, heavy polypeptide 8, skeletal muscle, perinatal</i> | Motor protein of muscle thick filaments                                                                         |
| 7   | 16826     | <i>Ldb2</i>          | 3.98                                   | <i>LIM domain binding 2</i>                                    | Binds to the LIM domain of a wide variety of LIM domain-containing transcription factors                        |
| 8   | 231440    | <i>9130213B05RIK</i> | 3.77                                   | <i>Prostate androgen-regulated mucin-like protein 1</i>        | May regulate TLP1 expression and telomerase activity, thus enabling certain prostatic cells to resist apoptosis |
| 9   | 140709    | <i>Emid2</i>         | 2.68                                   | <i>EMI domain containing 2</i>                                 | Unknown                                                                                                         |
| 10  | 328232    | <i>Gfod1</i>         | 2.66                                   | <i>Glucose-fructose oxidoreductase domain containing 1</i>     | Unknown                                                                                                         |
| 11  | 14955     | <i>H19</i>           | 2.65                                   | <i>H19 fetal liver mRNA</i>                                    | Activated in extraembryonic cell at implantation                                                                |
| 12  | 668171    | <i>Zxda</i>          | 2.60                                   | <i>Zinc finger, X-linked, duplicated A</i>                     | Cooperates with CIITA to promote transcription of MHC class I and MHC class II genes                            |
| 13  | 66643     | <i>Lix1</i>          | 2.47                                   | <i>Limb expression 1 homolog (chicken)</i>                     | Evolutionarily conserved and highly expressed in spinal cord motor neurons                                      |
| 14  | 12709     | <i>Ckb</i>           | 2.35                                   | <i>Creatine kinase, brain</i>                                  | Phospholipid biosynthesis                                                                                       |
| 15  | 66214     | <i>1190002H23RIK</i> | 2.31                                   | <i>RIKEN cDNA 1190002H23 gene</i>                              | Enhances CDK1 activity                                                                                          |
| 16  | 67026     | <i>Thap4</i>         | 2.20                                   | <i>THAP domain containing 4</i>                                | Unknown                                                                                                         |
| 17  | 319747    | <i>C130023A14RIK</i> | 2.15                                   | <i>RIKEN cDNA C130023A14 gene</i>                              | Unknown                                                                                                         |
| 18  | 100040413 | <i>LOC100040413</i>  | 2.14                                   | <i>Predicted gene 10075</i>                                    | Unknown                                                                                                         |
| 19  | 66943     | <i>Pqlc1</i>         | 2.06                                   | <i>PQ loop repeat containing 1</i>                             | Unknown                                                                                                         |

Table S1. Cont.

| No. | Gene ID | Gene Symbol          | Proximal/Distal<br>Ratio of Expression | Gene Name                                                                    | Function                                                                                                               |
|-----|---------|----------------------|----------------------------------------|------------------------------------------------------------------------------|------------------------------------------------------------------------------------------------------------------------|
| 20  | 83922   | <i>Tsgal4</i>        | 2.06                                   | <i>Testis specific gene A14</i>                                              | Unknown                                                                                                                |
| 21  | 208213  | <i>TMEM132C</i>      | 2.06                                   | <i>transmembrane protein 132C</i>                                            | Negative regulation of phosphatase activity                                                                            |
| 22  | 74718   | <i>Snx16</i>         | 2.00                                   | <i>sorting nexin 16</i>                                                      | Protein intracellular trafficking                                                                                      |
| 23  | 16898   | <i>Rps2</i>          | 0.49                                   | <i>Ribosomal protein S2</i>                                                  | Unknown                                                                                                                |
| 24  | 666676  | <i>LOC666676</i>     | 0.49                                   | <i>Predicted gene 8230</i>                                                   | Unknown                                                                                                                |
| 25  | 66409   | <i>Rsl1d1</i>        | 0.48                                   | <i>Ribosomal L1 domain containing 1</i>                                      | Unknown                                                                                                                |
| 26  | 72053   | <i>2010008E23RIK</i> | 0.48                                   | <i>Transmembrane and ubiquitin-like<br/>domain containing 2</i>              | Unknown                                                                                                                |
| 27  | 225849  | <i>Ppp2r5b</i>       | 0.48                                   | <i>Protein phosphatase 2, regulatory<br/>subunit B (B56), beta isoform</i>   | Unknown                                                                                                                |
| 28  | 56457   | <i>Clptm1</i>        | 0.47                                   | <i>Cleft lip and palate associated<br/>transmembrane protein 1</i>           | T-cell development                                                                                                     |
| 29  | 217365  | <i>Nploc4</i>        | 0.47                                   | <i>Nuclear protein localization 4 homolog<br/>(S. cerevisiae)</i>            | Binds ubiquitinated proteins                                                                                           |
| 30  | 224897  | <i>Dpp9</i>          | 0.47                                   | <i>Dipeptidylpeptidase 9</i>                                                 | Peptidase                                                                                                              |
| 31  | 258293  | <i>Olf437</i>        | 0.47                                   | <i>olfactory receptor 437</i>                                                | Interact with odorant molecules in the nose                                                                            |
| 32  | 22174   | <i>Tyro3</i>         | 0.46                                   | <i>TYRO3 protein tyrosine kinase 3</i>                                       | Receptor kinase that transduces signals from the extracellular<br>matrix into the cytoplasm by binding several ligands |
| 33  | 66525   | <i>Timm50</i>        | 0.46                                   | <i>Translocase of inner mitochondrial<br/>membrane 50 homolog (yeast)</i>    | Essential component of the TIM23 complex                                                                               |
| 34  | 319562  | <i>9630028B13RIK</i> | 0.46                                   | <i>RIKEN cDNA 9630028B13 gene</i>                                            | Unknown                                                                                                                |
| 35  | 26462   | <i>Txnrd2</i>        | 0.45                                   | <i>Thioredoxin reductase 2</i>                                               | Maintains thioredoxin in a reduced state                                                                               |
| 36  | 13361   | <i>Dhfr</i>          | 0.44                                   | <i>Dihydrofolate reductase</i>                                               | Folate metabolism                                                                                                      |
| 37  | 52846   | <i>D1bwg0212e</i>    | 0.44                                   | <i>DNA segment, Chr 1, Brigham &amp;<br/>Women's Genetics 0212 expressed</i> | Unknown                                                                                                                |

Table S1. Cont.

| No. | Gene ID | Gene Symbol          | Proximal/Distal<br>Ratio of Expression | Gene Name                                                                                       | Function                                                                                              |
|-----|---------|----------------------|----------------------------------------|-------------------------------------------------------------------------------------------------|-------------------------------------------------------------------------------------------------------|
| 38  | 272396  | <i>Tarsl2</i>        | 0.44                                   | <i>Threonyl-tRNA synthetase-like 2</i>                                                          | Unknown                                                                                               |
| 39  | 434204  | <i>Whdc1</i>         | 0.44                                   | <i>WAS protein homolog associated with actin,<br/>golgi membranes and microtubules</i>          | Stimulates Arp2/3-mediated actin polymerization at the<br>Golgi apparatus and along tubular membranes |
| 40  | 68544   | <i>2310036O22RIK</i> | 0.43                                   | <i>RIKEN cDNA 2310036O22 gene</i>                                                               | Unknown                                                                                               |
| 41  | 69168   | <i>Bola1</i>         | 0.43                                   | <i>bola-like 1 (E. coli)</i>                                                                    | Unknown                                                                                               |
| 42  | 319581  | <i>Xkr5</i>          | 0.42                                   | <i>X Kell blood group precursor-related<br/>family, member 5</i>                                | Unknown Function                                                                                      |
| 43  | 68895   | <i>Rasl11a</i>       | 0.41                                   | <i>RAS-like, family 11, member A</i>                                                            | Regulator of rDNA transcription                                                                       |
| 44  | 66570   | <i>Cenpm</i>         | 0.39                                   | <i>Centromere protein M</i>                                                                     | Assembly of kinetochore proteins                                                                      |
| 45  | 319480  | <i>Itga11</i>        | 0.39                                   | <i>Integrin alpha 11</i>                                                                        | Regulating Bone morphogenetic protein (BMP)-2 and<br>transforming growth factor (TGF)-beta1           |
| 46  | 69719   | <i>Cad</i>           | 0.38                                   | <i>Carbamoyl-phosphate synthetase 2,<br/>aspartate transcarbamylase, and<br/>dihydroorotase</i> | Unknown Function                                                                                      |
| 47  | 94065   | <i>Mrpl34</i>        | 0.38                                   | <i>Mitochondrial ribosomal protein L34</i>                                                      | Unknown                                                                                               |
| 48  | 68195   | <i>Rnaset2</i>       | 0.37                                   | <i>Ribonuclease T2B</i>                                                                         | Unknown                                                                                               |
| 49  | 70020   | <i>Znhit4</i>        | 0.37                                   | <i>INO80 complex subunit B</i>                                                                  | Core component of the INO80 complex                                                                   |
| 50  | 54632   | <i>Ftsj1</i>         | 0.36                                   | <i>FtsJ homolog 1 (E. coli)</i>                                                                 | Unknown Function                                                                                      |
| 51  | 235504  | <i>Slc17a5</i>       | 0.35                                   | <i>Solute carrier family 17 (anion/sugar<br/>transporter), member 5</i>                         | Primary solute translocator for anionic substances                                                    |
| 52  | 16876   | <i>Lhx9</i>          | 0.34                                   | <i>LIM homeobox protein 9</i>                                                                   | Gonadal development.                                                                                  |
| 53  | 20393   | <i>Sgk1</i>          | 0.34                                   | <i>Serum/glucocorticoid regulated kinase 1</i>                                                  | Regulation of a wide variety of ion channels                                                          |
| 54  | 16783   | <i>Lamp1</i>         | 0.33                                   | <i>lysosomal-associated membrane protein 1</i>                                                  | Presents carbohydrate ligands to selectins                                                            |

Table S1. Cont.

| No. | Gene ID | Gene Symbol      | Proximal/Distal<br>Ratio of Expression | Gene Name                                                                         | Function                                                                 |
|-----|---------|------------------|----------------------------------------|-----------------------------------------------------------------------------------|--------------------------------------------------------------------------|
| 55  | 107951  | <i>Cdk9</i>      | 0.32                                   | <i>Cyclin-dependent kinase 9<br/>(CDC2-related kinase)</i>                        | Regulation of transcription                                              |
| 56  | 19791   | <i>Rn18s</i>     | 0.31                                   | <i>18S ribosomal RNA</i>                                                          | Encodes a 18S rRNA                                                       |
| 57  | 192191  | <i>Med9</i>      | 0.30                                   | <i>Mediator of RNA polymerase II<br/>transcription, subunit 9 homolog (yeast)</i> | Regulates transcription of nearly all RNA polymerase II-dependent genes  |
| 58  | 621893  | <i>Hist2h2ab</i> | 0.28                                   | <i>Histone cluster 2, H2ab</i>                                                    | Core component of nucleosome                                             |
| 59  | 11806   | <i>Apoa1</i>     | 0.10                                   | <i>apolipoprotein A-I</i>                                                         | Reverse transport of cholesterol from tissues to the liver for excretion |

Table S2. Differential gene expression between the carpal and metacarpal regions of E13.5 mouse handplate.

| No. | Gene ID | Gene<br>Name    | Carpal/Metacarpal<br>Ratio of Expression | Gene Name                                                           | Function                                                                                                                            |
|-----|---------|-----------------|------------------------------------------|---------------------------------------------------------------------|-------------------------------------------------------------------------------------------------------------------------------------|
| 1   | 15214   | <i>Hey2</i>     | 0.49                                     | <i>Hairy/enhancer-of-split related with YRPW motif 2</i>            | Transcriptional repressor                                                                                                           |
| 2   | 15528   | <i>Hspe1</i>    | 0.49                                     | <i>Heat shock protein 1 (chaperonin 10)</i>                         | Inhibits lipopolysaccharide-induced inflammatory mediator production                                                                |
| 3   | 103172  | <i>Ndg2</i>     | 0.49                                     | <i>Coiled-coil-helix-coiled-coil-helix domain<br/>containing 10</i> | Unknown                                                                                                                             |
| 4   | 12301   | <i>Ccybp</i>    | 0.47                                     | <i>Calcyclin binding protein</i>                                    | CacyBP/SIP interacts with tubulin induces formation of globular tubulin assemblies                                                  |
| 5   | 22437   | <i>Cmya1</i>    | 0.45                                     | <i>Xin actin-binding repeat containing 1</i>                        | Xin is an actin binding protein which protects actin filaments from depolymerization and is expressed within muscle satellite cells |
| 6   | 26950   | <i>Vsnl1</i>    | 0.45                                     | <i>Visinin-like 1</i>                                               | Regulates the inhibition of rhodopsin phosphorylation in a calcium-dependent manner                                                 |
| 7   | 170812  | <i>Eraf</i>     | 0.45                                     | <i>Alpha hemoglobin stabilizing protein</i>                         | Chaperone for free alpha-hemoglobin (alpha-Hb)                                                                                      |
| 8   | 67712   | <i>Slc25a37</i> | 0.44                                     | <i>Solute carrier family 25, member 37</i>                          | Iron transporter                                                                                                                    |
| 9   | 17748   | <i>Mt1</i>      | 0.42                                     | <i>Metallothionein 1</i>                                            | These proteins are transcriptionally regulated by both heavy metals and glucocorticoids                                             |
| 10  | 17896   | <i>Myl4</i>     | 0.42                                     | <i>Myosin, light polypeptide 4</i>                                  | Regulatory light chain of myosin                                                                                                    |
| 11  | 17883   | <i>Myh3</i>     | 0.41                                     | <i>Myosin, heavy polypeptide 3,<br/>skeletal muscle, embryonic</i>  | Mutations in this gene have been associated with Freeman-Sheldon syndrome and Sheldon-Hall syndrome                                 |

Table S2. Cont.

| No. | Gene ID | Gene Name      | Carpal/Metacarpal Ratio of Expression | Gene Name                                                      | Function                                                                                                              |
|-----|---------|----------------|---------------------------------------|----------------------------------------------------------------|-----------------------------------------------------------------------------------------------------------------------|
| 12  | 17885   | <i>Myh8</i>    | 0.41                                  | <i>Myosin, heavy polypeptide 8, skeletal muscle, perinatal</i> | Motor protein of muscle thick filaments                                                                               |
| 13  | 21380   | <i>Tbx1</i>    | 0.39                                  | <i>T-box 1</i>                                                 | Important regulatory gene in development, highly expressed in hair follicle (HF) stem cells                           |
| 14  | 21955   | <i>Tnnt1</i>   | 0.37                                  | <i>Troponin T1, skeletal, slow</i>                             | The tropomyosin-binding subunit of troponin, the thin filament regulatory complex which confers calcium-sensitivity   |
| 15  | 68895   | <i>Rasl11a</i> | 0.37                                  | <i>RAS-like, family 11, member A</i>                           | Regulator of rDNA transcription. Acts in cooperation UBF/UBTF and positively regulates RNA polymerase I transcription |
| 16  | 11472   | <i>Actn2</i>   | 0.34                                  | <i>Actinin alpha 2</i>                                         | F-actin cross-linking protein which is thought to anchor actin to a variety of intracellular structures               |
| 17  | 109978  | <i>Art4</i>    | 0.3                                   | <i>ADP-ribosyltransferase 4</i>                                | may be part of a novel protein family with an important role in regulating cell function                              |
| 18  | 21924   | <i>Tnnc1</i>   | 0.25                                  | <i>Troponin C, cardiac/slow skeletal</i>                       | Troponin is the central regulatory protein of striated muscle contraction.                                            |

Table S3. Differential gene expression between the proximal region of E12.5 handplate and the carpal region of E13.5 mouse handplate.

| No. | Gene ID | Gene Symbol          | E12.5 Proximal/E13.5 Carpal Ratio of Expression | Gene Name                                                      | Function                                                               |
|-----|---------|----------------------|-------------------------------------------------|----------------------------------------------------------------|------------------------------------------------------------------------|
| 1   | 17885   | <i>Myh8</i>          | 3.65                                            | <i>Myosin, heavy polypeptide 8, skeletal muscle, perinatal</i> | Motor protein of muscle thick filaments                                |
| 2   | 77254   | <i>Yif1b</i>         | 3.40                                            | <i>Yip1 interacting factor homolog B (S. cerevisiae)</i>       | Unknown                                                                |
| 3   | 16783   | <i>Lamp1</i>         | 3.39                                            | <i>Lysosomal-associated membrane protein 1</i>                 | Presents carbohydrate ligands to selectins                             |
| 4   | 18453   | <i>P4hb</i>          | 3.31                                            | <i>Prolyl 4-hydroxylase, beta polypeptide</i>                  | Catalyzes the formation, breakage and rearrangement of disulfide bonds |
| 5   | 328234  | <i>Rnf182</i>        | 3.20                                            | <i>Ring finger protein 182</i>                                 | E3 ubiquitin-protein ligase                                            |
| 6   | 66184   | <i>Rps4y2</i>        | 3.09                                            | <i>Ribosomal protein S4, Y-linked 2</i>                        | Unknown                                                                |
| 7   | 14230   | <i>Fkbp10</i>        | 3.08                                            | <i>FK506 binding protein 10</i>                                | PPIases accelerate the folding of proteins during protein synthesis    |
| 8   | 11803   | <i>Aplp1</i>         | 3.05                                            | <i>Amyloid beta (A4) precursor-like protein 1</i>              | May play a role in postsynaptic function                               |
| 9   | 72053   | <i>2010008E23rik</i> | 3.02                                            | <i>Transmembrane and ubiquitin-like domain containing 2</i>    | Unknown                                                                |

Table S3. Cont.

| No. | Gene ID | Gene Symbol   | E12.5 Proximal/E13.5 Carpal<br>Ratio of Expression | Gene Name                                                                          | Function                                                                                               |
|-----|---------|---------------|----------------------------------------------------|------------------------------------------------------------------------------------|--------------------------------------------------------------------------------------------------------|
| 10  | 216964  | 2410019G02Rik | 2.98                                               | Transformation related protein 53 inducible protein 13                             | Unknown                                                                                                |
| 11  | 235504  | Slc17a5       | 2.97                                               | Solute carrier family 17 (anion/sugar transporter), member 5                       | Primary solute translocator for anionic substances                                                     |
| 12  | 434204  | Whdc1         | 2.95                                               | WAS protein homolog associated with actin, golgi membranes and microtubules        | Acts as a nucleation-promoting factor (NPF) that stimulates Arp2/3-mediated actin                      |
| 13  | 107951  | Cdk9          | 2.88                                               | Cyclin-dependent kinase 9 (CDC2-related kinase)                                    | Protein kinase involved in the regulation of transcription.                                            |
| 14  | 107729  | Ubg           | 2.83                                               | Ubiquitin, beta-galactosidase related                                              | Unknown                                                                                                |
| 15  | 16010   | Igfbp4        | 2.81                                               | Insulin-like growth factor binding protein 4                                       | Prolong the half-life of the IGFs and have been shown to either inhibit or stimulate the growth        |
| 16  | 224650  | Anks1         | 2.78                                               | Ankyrin repeat and SAM domain containing 1                                         | Regulator of different signaling pathways.<br>Regulates EPHA8 receptor tyrosine kinase signaling       |
| 17  | 225849  | Ppp2r5b       | 2.78                                               | Protein phosphatase 2, regulatory subunit B (B56), beta isoform                    | Unknown                                                                                                |
| 18  | 8665    | Eif3f         | 2.53                                               | Eukaryotic translation initiation factor 3, subunit F                              | Component of the eIF-3 complex, required for several steps in the initiation of protein synthesis      |
| 19  | 399673  | Tdpoz2        | 2.48                                               | TD and POZ domain containing 2                                                     | TDPOZ, a family of bipartite animal and plant proteins that contain the TRAF (TD) and POZ/BTB domains. |
| 20  | 666676  | LOC666676     | 2.48                                               | Predicted gene 8230                                                                | Unknown                                                                                                |
| 21  | 109205  | 5330439J01Rik | 2.41                                               | Sine oculis-binding protein homolog (Drosophila)                                   | Strong expression in the limbic system at the time interval of active synaptogenesis.                  |
| 22  | 66043   | Atp5d         | 2.40                                               | ATP synthase, H <sup>+</sup> transporting, mitochondrial F1 complex, delta subunit | Produces ATP from ADP in the presence of a proton gradient across the membrane.                        |
| 23  | 21804   | Tgfb1l1       | 2.39                                               | Transforming growth factor beta 1 induced transcript 1                             | A molecular adapter coordinating multiple protein–protein interactions at the focal adhesion complex   |

Table S3. Cont.

| No. | Gene ID | Gene Symbol          | E12.5 Proximal/E13.5 Carpal<br>Ratio of Expression | Gene Name                                                            | Function                                                                                             |
|-----|---------|----------------------|----------------------------------------------------|----------------------------------------------------------------------|------------------------------------------------------------------------------------------------------|
| 24  | 19223   | <i>Ptgis</i>         | 2.36                                               | <i>Prostaglandin I2 (prostacyclin) synthase</i>                      | Catalyzes the isomerization of prostaglandin H2 to prostaglandin I2                                  |
| 25  | 70020   | <i>Znhit4</i>        | 2.35                                               | <i>INO80 complex subunit B</i>                                       | Involved in transcriptional regulation,<br>DNA replication and probably DNA repair                   |
| 26  | 12522   | <i>Cd83</i>          | 2.34                                               | <i>CD83 antigen</i>                                                  | Associates with CD4 or CD8 and delivers<br>costimulatory signals for the TCR/CD3 pathway             |
| 27  | 217351  | <i>9930033H14Rik</i> | 2.34                                               | <i>Trinucleotide repeat containing 6C</i>                            | Plays a role in RNA-mediated gene silencing<br>by micro-RNAs (miRNAs)                                |
| 28  | 108013  | <i>A230070D14Rik</i> | 2.33                                               | <i>CUGBP, Elav-like family member 4</i>                              | RNA-binding protein implicated in the regulation of pre-mRNA<br>alternative splicing                 |
| 29  | 230073  | <i>Ddx58</i>         | 2.31                                               | <i>DEAD (Asp-Glu-Ala-Asp) box polypeptide 58</i>                     | Innate immune receptor which acts as a<br>cytoplasmic sensor of viral nucleic acids                  |
| 30  | 94230   | <i>Cpsf1</i>         | 2.28                                               | <i>Cleavage and polyadenylation specific factor 1</i>                | Pre-mRNA 3'-end formation, recognizing the<br>AAUAAA signal sequence                                 |
| 31  | 217030  | <i>Ap1gbp1</i>       | 2.27                                               | <i>Synergins, gamma</i>                                              | Endocytosis and/or membrane trafficking at the trans-Golgi network                                   |
| 32  | 57773   | <i>Wdr4</i>          | 2.26                                               | <i>WD repeat domain 4</i>                                            | Required for the formation of N(7)-methylguanine<br>at position 46 (m7G46) in tRNA                   |
| 33  | 66085   | <i>Eif3s5</i>        | 2.26                                               | <i>Eukaryotic translation initiation factor 3,<br/>subunit F</i>     | Component of the eukaryotic translation<br>initiation factor 3 (eIF-3) complex                       |
| 34  | 19727   | <i>Rfxank</i>        | 2.25                                               | <i>regulatory factor X-associated<br/>ankyrin-containing protein</i> | Activates transcription from class II MHC promoters                                                  |
| 35  | 258293  | <i>Olfir437</i>      | 2.24                                               | <i>Olfactory receptor 437</i>                                        | Interact with odorant molecules in the nose                                                          |
| 36  | 29862   | <i>Ninj2</i>         | 2.21                                               | <i>Ninjurin 2</i>                                                    | Homophilic cell adhesion molecule that promotes axonal growth                                        |
| 37  | 22174   | <i>Tyro3</i>         | 2.20                                               | <i>TYRO3 protein tyrosine kinase 3</i>                               | Receptor tyrosine kinase that transduces signals<br>from the extracellular matrix into the cytoplasm |

Table S3. Cont.

| No. | Gene ID   | Gene Symbol          | E12.5 Proximal/E13.5 Carpal<br>Ratio of Expression | Gene Name                                                                                   | Function                                                                                                    |
|-----|-----------|----------------------|----------------------------------------------------|---------------------------------------------------------------------------------------------|-------------------------------------------------------------------------------------------------------------|
| 38  | 12705     | <i>Cited1</i>        | 2.18                                               | <i>Cbp/p300-interacting transactivator with<br/>Glu/Asp-rich carboxy-terminal domain 1</i>  | Transcriptional coactivator of the p300/CBP-mediated<br>transcription complex                               |
| 39  | 14950     | <i>H13</i>           | 2.18                                               | <i>Histocompatibility 13</i>                                                                | Catalyzes intramembrane proteolysis of some<br>signal peptides after they have been cleaved                 |
| 40  | 56212     | <i>Rhog</i>          | 2.15                                               | <i>Ras homolog gene family, member G</i>                                                    | Required for the formation of membrane<br>ruffles during macropinocytosis                                   |
| 41  | 13057     | <i>Cyba</i>          | 2.11                                               | <i>Cytochrome b-245, alpha polypeptide</i>                                                  | Critical component of the membrane-bound oxidase of<br>phagocytes that generates superoxide                 |
| 42  | 13650     | <i>Rhbdf1</i>        | 2.10                                               | <i>Rhomboid family 1 (Drosophila)</i>                                                       | Regulates the secretion of several ligands of<br>the epidermal growth factor receptor                       |
| 43  | 13008     | <i>Csrp2</i>         | 2.09                                               | <i>Cysteine and glycine-rich protein 2</i>                                                  | CRP2 acted as a potent transcription coadaptor<br>that remodeled silent cardiac myocyte chromatin           |
| 44  | 57436     | <i>Gabarapl1</i>     | 2.09                                               | <i>Gamma-aminobutyric acid (GABA)<br/>A receptor-associated protein-like 1</i>              | Negatively regulates Wnt/beta-catenin signaling<br>by mediating Dvl2 degradation                            |
| 45  | 100113398 | <i>A430024h01rik</i> | 2.09                                               | <i>Adenosine deaminase, tRNA-specific 3,<br/>TAD2 homolog (S. cerevisiae)</i>               | Deamination of adenosine-34 to inosine in<br>many tRNAs as a regulatory subunit Potential                   |
| 46  | 51792     | <i>Ppp2r1a</i>       | 2.08                                               | <i>Protein phosphatase 2 (formerly 2A), regulatory<br/>subunit A (PR 65), alpha isoform</i> | Required for proper chromosome segregation and<br>for centromeric localization of SGOL1 in mitosis          |
| 47  | 223776    | <i>I300018J18Rik</i> | 2.08                                               | <i>RIKEN cDNA I300018J18 gene</i>                                                           | A selenoprotein, which contains a<br>selenocysteine (Sec) residue at its active site                        |
| 48  | 15488     | <i>Hsd17b4</i>       | 2.05                                               | <i>Hydroxysteroid (17-beta) dehydrogenase 4</i>                                             | Bifunctional enzyme acting on the peroxisomal<br>beta-oxidation pathway for fatty acids                     |
| 49  | 106068    | <i>Slc45a4</i>       | 2.05                                               | <i>Solute carrier family 45, member 4</i>                                                   | Unknown                                                                                                     |
| 50  | 58202     | <i>Cobra1</i>        | 2.04                                               | <i>Cofactor of BRCA1</i>                                                                    | Essential to the NELF complex, negatively regulates<br>the elongation of transcription by RNA polymerase II |

Table S3. Cont.

| No. | Gene ID | Gene Symbol          | E12.5 Proximal/E13.5 Carpal<br>Ratio of Expression | Gene Name                                                            | Function                                                                                              |
|-----|---------|----------------------|----------------------------------------------------|----------------------------------------------------------------------|-------------------------------------------------------------------------------------------------------|
| 51  | 12826   | <i>Col4a1</i>        | 2.02                                               | <i>Collagen, type IV, alpha 1</i>                                    | Type IV collagen is the major structural component of glomerular basement membranes                   |
| 52  | 22384   | <i>Eif4h</i>         | 2.00                                               | <i>Eukaryotic translation initiation factor 4H</i>                   | Stimulates the RNA helicase activity of EIF4A in the translation initiation complex                   |
| 53  | 17149   | <i>Magoh</i>         | 0.49                                               | <i>Mago-nashi homolog, proliferation-associated (Drosophila)</i>     | Mouse magoh is involved in cyclin-dependent kinase regulation.                                        |
| 54  | 326619  | <i>Hist1h4a</i>      | 0.49                                               | <i>Histone cluster 1, H4a</i>                                        | Core component of nucleosome.<br>Nucleosomes wrap and compact DNA into chromatin                      |
| 55  | 67154   | <i>Mtdh</i>          | 0.48                                               | <i>Metadherin</i>                                                    | Downregulates SLC1A2/EAAT2 promoter activity when expressed ectopically                               |
| 56  | 67713   | <i>Dnajc19</i>       | 0.48                                               | <i>DnaJ (Hsp40) homolog, subfamily C, member 19</i>                  | Probable component of a complex required for the translocation of transit peptide-containing proteins |
| 57  | 68735   | <i>Mrps18c</i>       | 0.48                                               | <i>Mitochondrial ribosomal protein S18C</i>                          | Unknown                                                                                               |
| 58  | 70257   | <i>2010107E04Rik</i> | 0.48                                               | <i>RIKEN cDNA 2010107E04 gene</i>                                    | Unknown                                                                                               |
| 59  | 109672  | <i>Cyb5</i>          | 0.48                                               | <i>Cytochrome b-5</i>                                                | Cytochrome b5 is a membrane bound hemoprotein which function as an electron carrier                   |
| 60  | 225058  | <i>LOC225058</i>     | 0.48                                               | <i>Predicted gene 4832</i>                                           | Unknown                                                                                               |
| 61  | 319180  | <i>Hist1h2bf</i>     | 0.48                                               | <i>Histone cluster 1, H2bf</i>                                       | Core component of nucleosome                                                                          |
| 62  | 69010   | <i>Anapc13</i>       | 0.46                                               | <i>Anaphase promoting complex subunit 13</i>                         | Component of the anaphase promoting complex/cyclosome                                                 |
| 63  | 78651   | <i>Lsm6</i>          | 0.46                                               | <i>LSM6 homolog, U6 small nuclear RNA associated (S. cerevisiae)</i> | Component of LSm complexes, involved in RNA processing and may function in a chaperone-like manner    |

Table S3. Cont.

| No. | Gene ID   | Gene Symbol          | E12.5 Proximal/E13.5 Carpal<br>Ratio of Expression | Gene Name                                                                    | Function                                                                                                     |
|-----|-----------|----------------------|----------------------------------------------------|------------------------------------------------------------------------------|--------------------------------------------------------------------------------------------------------------|
| 64  | 66915     | <i>Myevo2</i>        | 0.45                                               | <i>Myeloma overexpressed 2</i>                                               | Unknown                                                                                                      |
| 65  | 69702     | <i>Ndufaf1</i>       | 0.45                                               | <i>NADH dehydrogenase (ubiquinone) 1 alpha subcomplex, assembly factor 1</i> | Chaperone protein involved in the assembly of the mitochondrial NADH:ubiquinone oxidoreductase complex       |
| 66  | 72657     | <i>2700094K13Rik</i> | 0.45                                               | <i>RIKEN cDNA 2700094K13 gene</i>                                            | A selenoprotein, which contains a selenocysteine (Sec) residue at its active site.                           |
| 67  | 66286     | <i>Sec11c</i>        | 0.44                                               | <i>SEC11 homolog C (S. cerevisiae)</i>                                       | Component of the microsomal signal peptidase complex which removes signal peptides from nascent proteins     |
| 68  | 54405     | <i>Ndufa1</i>        | 0.43                                               | <i>NADH dehydrogenase (ubiquinone) 1 alpha subcomplex, 1</i>                 | Accessory subunit of the mitochondrial membrane respiratory chain NADH dehydrogenase                         |
| 69  | 100043304 | <i>LOC100047905</i>  | 0.43                                               | <i>S-adenosylmethionine decarboxylase, pseudogene 3</i>                      | Unknown                                                                                                      |
| 70  | 17709     | <i>Mt-co2</i>        | 0.42                                               | <i>Cytochrome c oxidase subunit II</i>                                       | component of the respiratory chain Subunit 2 transfers the electrons from cytochrome c                       |
| 71  | 668171    | <i>Zxda</i>          | 0.42                                               | <i>zinc finger, X-linked, duplicated A</i>                                   | Cooperates with CIITA to promote transcription of MHC class I and MHC class II genes                         |
| 72  | 8626578   | <i>Nola3</i>         | 0.41                                               | <i>H/ACA RNP complex subunit 3</i>                                           | Unknown                                                                                                      |
| 73  | 14156     | <i>Fen1</i>          | 0.40                                               | <i>Flap structure specific endonuclease 1</i>                                | FEN1 has roles in DNA repair, as well as in DNA replication                                                  |
| 74  | 15387     | <i>Hnrpk</i>         | 0.40                                               | <i>Heterogeneous nuclear ribonucleoprotein K</i>                             | One of the major pre-mRNA-binding proteins                                                                   |
| 75  | 27356     | <i>Insl6</i>         | 0.40                                               | <i>Insulin-like 6</i>                                                        | Most abundantly expressed in tissues rich in highly ciliated cells and is predicted to be important to cilia |
| 76  | 15126     | <i>Hba-x</i>         | 0.38                                               | <i>Hemoglobin X, alpha-like embryonic chain in Hba complex</i>               | The zeta chain is an alpha-type chain of mammalian embryonic hemoglobin                                      |
| 77  | 15528     | <i>Hspe1</i>         | 0.38                                               | <i>Heat shock protein 1 (chaperonin 10)</i>                                  | Heat shock protein 10 inhibits lipopolysaccharide-induced inflammatory mediator production                   |

Table S3. Cont.

| No. | Gene ID   | Gene Symbol          | E12.5 Proximal/E13.5 Carpal<br>Ratio of Expression | Gene Name                                                                              | Function                                                                                                                  |
|-----|-----------|----------------------|----------------------------------------------------|----------------------------------------------------------------------------------------|---------------------------------------------------------------------------------------------------------------------------|
| 78  | 54367     | <i>Zfp326</i>        | 0.38                                               | <i>Zinc finger protein 326</i>                                                         | Core component of the DBIRD complex, a multiprotein complex                                                               |
| 79  | 67371     | <i>2410016F19Rik</i> | 0.38                                               | <i>General transcription factor IIIC, polypeptide 6, alpha</i>                         | Involved in RNA polymerase III-mediated transcription                                                                     |
| 80  | 67899     | <i>2010110K16Rik</i> | 0.38                                               | <i>COX assembly mitochondrial protein homolog</i><br>( <i>S. cerevisiae</i> )          | Required for mitochondrial cytochrome c oxidase (COX)<br>assembly and respiration. Binds copper                           |
| 81  | 73736     | <i>1110008B24Rik</i> | 0.38                                               | <i>FCF1 small subunit (SSU) processome component</i><br><i>homolog (S. cerevisiae)</i> | Essential protein involved in pre-rRNA processing<br>and 40S ribosomal subunit assembly By similarity                     |
| 82  | 76915     | <i>Mnd1</i>          | 0.38                                               | <i>Meiotic nuclear divisions 1 homolog (S. cerevisiae)</i>                             | Required for proper homologous chromosome pairing and<br>efficient cross-over and intragenic recombination during meiosis |
| 83  | 319158    | <i>Hist1h4i</i>      | 0.37                                               | <i>histone cluster 1, H4i</i>                                                          | Core component of nucleosome. Nucleosomes wrap<br>and compact DNA into chromatin                                          |
| 84  | 26450     | <i>Rbbp9</i>         | 0.35                                               | <i>Retinoblastoma binding protein 9</i>                                                | RBBP9 is expression inversely correlated with<br>RB phosphorylation                                                       |
| 85  | 20533     | <i>Slc4a1</i>        | 0.34                                               | <i>Solute carrier family 4 (anion exchanger), member 1</i>                             | Band 3 is the major integral glycoprotein<br>of the erythrocyte membrane                                                  |
| 86  | 17972     | <i>Ncf4</i>          | 0.32                                               | <i>Neutrophil cytosolic factor 4</i>                                                   | Component of the NADPH-oxidase, a multicomponent enzyme<br>system responsible for the oxidative burst                     |
| 87  | 109978    | <i>Art4</i>          | 0.25                                               | <i>ADP-ribosyltransferase 4</i>                                                        | May be part of a novel protein family with<br>an important role in regulating cell function                               |
| 88  | 170812    | <i>Eraf</i>          | 0.23                                               | <i>Alpha hemoglobin stabilizing protein</i>                                            | Chaperone for free alpha-hemoglobin                                                                                       |
| 89  | 100000000 | <i>LOC100040413</i>  | 0.22                                               | <i>Predicted gene 10075</i>                                                            | Unknown                                                                                                                   |
| 90  | 11806     | <i>Apoa1</i>         | 0.21                                               | <i>Apolipoprotein A-I</i>                                                              | Reverse transport of cholesterol from tissues to the liver<br>for excretion                                               |
| 91  | 54419     | <i>Cldn6</i>         | 0.14                                               | <i>Claudin 6</i>                                                                       | Plays a major role in tight junction-specific<br>obliteration of the intercellular space                                  |

**Table S4.** Differential gene expression between the proximal region of E12.5 handplate and the metacarpal-phalange region of E13.5 mouse handplate.

| No. | Gene ID | Gene Symbol   | E12.5 Proximal/E13.5<br>Metacarpal-Phalange<br>Ratio of Expression | Gene Name                                                                          | Function                                                                                              |
|-----|---------|---------------|--------------------------------------------------------------------|------------------------------------------------------------------------------------|-------------------------------------------------------------------------------------------------------|
| 1   | 17885   | <i>Myh8</i>   | 7.06                                                               | <i>Myosin, heavy polypeptide 8, skeletal muscle, perinatal</i>                     | Motor protein of muscle thick filaments                                                               |
| 2   | 224650  | <i>Anks1</i>  | 3.55                                                               | <i>Ankyrin repeat and SAM domain containing 1</i>                                  | Regulator of different signaling pathways                                                             |
| 3   | 66184   | <i>Rps4y2</i> | 3.43                                                               | <i>Ribosomal protein S4, Y-linked 2</i>                                            | Unknown                                                                                               |
| 4   | 399673  | <i>Tdpoz2</i> | 3.39                                                               | <i>TD and POZ domain containing 2</i>                                              | TDPOZ, a family of bipartite animal and plant proteins that contain the TRAF (TD) and POZ/BTB domains |
| 5   | 434204  | <i>Whdc1</i>  | 3.3                                                                | <i>WAS protein homolog associated with actin, golgi membranes and microtubules</i> | Acts as a nucleation-promoting factor (NPF) that stimulates Arp2/3-mediated actin polymerization      |
| 6   | 217030  | <i>Synrg</i>  | 3.15                                                               | <i>Synergisin, gamma</i>                                                           | May play a role in endocytosis and/or membrane trafficking at the trans-Golgi network                 |
| 7   | 103172  | <i>Ndg2</i>   | 3.07                                                               | <i>Coiled-coil-helix-coiled-coil-helix domain containing 10</i>                    | Unknown                                                                                               |
| 8   | 21847   | <i>Klf10</i>  | 2.99                                                               | <i>Kruppel-like factor 10</i>                                                      | Transcriptional repressor involved in the regulation of cell growth. Inhibits cell growth             |
| 9   | 71913   | <i>Tmem79</i> | 2.85                                                               | <i>Transmembrane protein 79</i>                                                    | Unknown                                                                                               |
| 10  | 11472   | <i>Actn2</i>  | 2.8                                                                | <i>Actinin alpha 2</i>                                                             | Protein anchors actin to a variety of intracellular structures. This is a bundling protein            |
| 11  | 16783   | <i>Lamp1</i>  | 2.8                                                                | <i>Lysosomal-associated membrane protein 1</i>                                     | Presents carbohydrate ligands to selectins. Also implicated in tumor cell metastasis                  |
| 12  | 17896   | <i>Myl4</i>   | 2.8                                                                | <i>Myosin, light polypeptide 4</i>                                                 | Regulatory light chain of myosin. Does not bind calcium                                               |
| 13  | 15129   | <i>Hbb-b1</i> | 2.77                                                               | <i>Hemoglobin, beta adult major chain</i>                                          | Involved in oxygen transport from the lung to the various peripheral tissues.                         |
| 14  | 20739   | <i>Spna1</i>  | 2.72                                                               | <i>Spna1 spectrin alpha 1</i>                                                      | Major constituent of the cytoskeletal network underlying the erythrocyte plasma membrane              |
| 15  | 12522   | <i>Cd83</i>   | 2.65                                                               | <i>CD83 antigen</i>                                                                | Associates with CD4 or CD8 and delivers costimulatory signals for the TCR/CD3 pathway                 |

Table S4. Cont.

| No. | Gene ID | Gene Symbol          | E12.5 Proximal/E13.5<br>Metacarpal-Phalange<br>Ratio of Expression | Gene Name                                                                                   | Function                                                                                                   |
|-----|---------|----------------------|--------------------------------------------------------------------|---------------------------------------------------------------------------------------------|------------------------------------------------------------------------------------------------------------|
| 16  | 58805   | <i>Wbscr14</i>       | 2.63                                                               | <i>MLX interacting protein-like</i>                                                         | Transcriptional repressor                                                                                  |
| 17  | 68895   | <i>Rasl11a</i>       | 2.62                                                               | <i>RAS-like, family 11, member A</i>                                                        | Regulator of rDNA transcription. Acts in cooperation<br>UBF/UBTF and positively regulates RNA polymerase I |
| 18  | 235504  | <i>Slc17a5</i>       | 2.6                                                                | <i>Solute carrier family 17 (anion/sugar transporter),<br/>member 5</i>                     | Solute translocator for anionic substances                                                                 |
| 19  | 217365  | <i>Nploc4</i>        | 2.55                                                               | <i>Nuclear protein localization 4 homolog (S. cerevisiae)</i>                               | Necessary for the export of misfolded proteins from the ER to<br>the cytoplasm                             |
| 20  | 19659   | <i>Rbp1</i>          | 2.51                                                               | <i>Retinol binding protein 1, cellular</i>                                                  | Intracellular transport of retinol                                                                         |
| 21  | 68204   | <i>2900060B14Rik</i> | 2.47                                                               | <i>RIKEN cDNA 2900060B14 gene</i>                                                           | Unknown                                                                                                    |
| 22  | 76367   | <i>Trp53rk</i>       | 2.46                                                               | <i>Transformation related protein 53 regulating kinase</i>                                  | Protein kinase that phosphorylates “Ser-15” of p53/TP53<br>protein and may participate in its activation   |
| 23  | 14941   | <i>Ubg</i>           | 2.45                                                               | <i>Ubiquitin, beta-galactosidase related</i>                                                | Unknown                                                                                                    |
| 24  | 14941   | <i>Gzmd</i>          | 2.45                                                               | <i>Granzyme D</i>                                                                           | Unknown                                                                                                    |
| 25  | 80880   | <i>Kank3</i>         | 2.44                                                               | <i>KN motif and ankyrin repeat domains 3</i>                                                | Unknown                                                                                                    |
| 26  | 94230   | <i>Cpsfl</i>         | 2.43                                                               | <i>Cleavage and polyadenylation specific factor 1</i>                                       | Component of the cleavage and polyadenylation<br>specificity factor (CPSF) complex                         |
| 27  | 21380   | <i>Tbx1</i>          | 2.41                                                               | <i>T-box 1</i>                                                                              | Key regulatory gene in development, is highly expressed<br>in hair follicle (HF) stem cells in adult mice  |
| 28  | 69719   | <i>Cad</i>           | 2.4                                                                | <i>Carbamoyl-phosphate synthetase 2, aspartate<br/>transcarbamylase, and dihydroorotase</i> | Unknown                                                                                                    |
| 29  | 13139   | <i>Dgka</i>          | 2.38                                                               | <i>Diacylglycerol kinase, alpha</i>                                                         | Converts the second messenger diacylglycerol into phosphatidate                                            |
| 30  | 666676  | <i>LOC666676</i>     | 2.36                                                               | <i>Predicted gene 8230</i>                                                                  | Unknown                                                                                                    |
| 31  | 52846   | <i>D1bwg0212e</i>    | 2.33                                                               | <i>DNA segment, Chr 1, Brigham &amp; Women's Genetics 0212<br/>expressed</i>                | Unknown                                                                                                    |
| 32  | 26383   | <i>Fto</i>           | 2.33                                                               | <i>Fat mass and obesity associated</i>                                                      | Contributes to the regulation of body size and body<br>fat accumulation                                    |

Table S4. Cont.

| No. | Gene ID | Gene Symbol               | E12.5 Proximal/E13.5<br>Metacarpal-Phalange<br>Ratio of Expression | Gene Name                                                                                    | Function                                                                                                                                                                                                    |
|-----|---------|---------------------------|--------------------------------------------------------------------|----------------------------------------------------------------------------------------------|-------------------------------------------------------------------------------------------------------------------------------------------------------------------------------------------------------------|
| 33  | 29862   | <i>Ninj2</i>              | 2.32                                                               | <i>Ninjurin 2</i>                                                                            | Homophilic cell adhesion molecule that promotes axonal growth                                                                                                                                               |
| 34  | 12521   | <i>Cd82</i>               | 2.31                                                               | <i>CD82 antigen</i>                                                                          | Associates with CD4 or CD8 and delivers costimulatory signals<br>for the TCR/CD3 pathway                                                                                                                    |
| 35  | 20393   | <i>Sgk1</i>               | 2.31                                                               | <i>Serum/glucocorticoid regulated kinase 1</i>                                               | Regulation of a wide variety of ion channels, membrane<br>transporters, cellular enzymes, transcription factors, neuronal<br>excitability, cell growth, proliferation, survival,<br>migration and apoptosis |
| 36  | 545253  | <i>Eg545253</i>           | 2.29                                                               | <i>predicted gene 5820</i>                                                                   | Unknown                                                                                                                                                                                                     |
| 37  | 66043   | <i>Atp5d</i>              | 2.28                                                               | <i>ATP synthase, H<sup>+</sup> transporting, mitochondrial F1<br/>complex, delta subunit</i> | Produces ATP from ADP in the presence of a proton gradient<br>across the membrane which is generated by electron transport                                                                                  |
| 38  | 224897  | <i>Dpp9</i>               | 2.28                                                               | <i>Dipeptidylpeptidase 9</i>                                                                 | Dipeptidyl peptidase                                                                                                                                                                                        |
| 39  | 11629   | <i>Aif1</i>               | 2.26                                                               | <i>Allograft inflammatory factor 1</i>                                                       | Enhances the actin-bundling activity of LCP1                                                                                                                                                                |
| 40  | 72454   | <i>Ccdc71</i>             | 2.25                                                               | <i>coiled-coil domain containing 71</i>                                                      | Unknown                                                                                                                                                                                                     |
| 41  | 54473   | <i>Tollip</i>             | 2.24                                                               | <i>Toll interacting protein</i>                                                              | Recruits IRAK1 to the IL-1 receptor complex                                                                                                                                                                 |
| 42  | 18453   | <i>P4hb</i>               | 2.23                                                               | <i>Prolyl 4-hydroxylase, beta polypeptide</i>                                                | This multifunctional protein catalyzes the formation,<br>breakage and rearrangement of disulfide bonds                                                                                                      |
| 43  | 109205  | <i>5330439J01RIK/Sobp</i> | 2.23                                                               | <i>Sine oculis-binding protein homolog (Drosophila)</i>                                      | Implicated in development of the cochlea                                                                                                                                                                    |
| 44  | 223870  | <i>Senp1</i>              | 2.22                                                               | <i>SUMO1/sentrin specific peptidase 1</i>                                                    | Protease that catalyzes two essential functions<br>in the SUMO pathway                                                                                                                                      |
| 45  | 70335   | <i>Reep6</i>              | 2.21                                                               | <i>Receptor accessory protein 6</i>                                                          | May enhance the cell surface expression of odorant receptors                                                                                                                                                |
| 46  | 13057   | <i>Cyba</i>               | 2.19                                                               | <i>Cytochrome b-245, alpha polypeptide</i>                                                   | Critical component of the membrane-bound oxidase<br>of phagocytes that generates superoxide                                                                                                                 |
| 47  | 69009   | <i>Thap7</i>              | 2.18                                                               | <i>THAP domain containing 7</i>                                                              | Chromatin-associated, histone tail-binding protein<br>that represses transcription                                                                                                                          |
| 48  | 107951  | <i>Cdk9</i>               | 2.18                                                               | <i>Cyclin-dependent kinase 9 (CDC2-related kinase)</i>                                       | Protein kinase involved in the regulation of transcription                                                                                                                                                  |

Table S4. Cont.

| No. | Gene ID   | Gene Symbol                | E12.5 Proximal/E13.5<br>Metacarpal-Phalange<br>Ratio of Expression | Gene Name                                                                     | Function                                                                                              |
|-----|-----------|----------------------------|--------------------------------------------------------------------|-------------------------------------------------------------------------------|-------------------------------------------------------------------------------------------------------|
| 49  | 11927     | <i>Atox1</i>               | 2.15                                                               | <i>ATX1 (antioxidant protein 1) homolog 1 (yeast)</i>                         | Could bind and deliver cytosolic copper to the copper ATPase proteins                                 |
| 50  | 17748     | <i>Mt1</i>                 | 2.15                                                               | <i>Metallothionein 1</i>                                                      | These proteins are transcriptionally regulated by both heavy metals and glucocorticoids               |
| 51  | 70020     | <i>Znhit4</i>              | 2.15                                                               | <i>INO80 complex subunit B</i>                                                | Proposed core component of the chromatin remodeling INO80 complex                                     |
| 52  | 211499    | <i>Tmem87A</i>             | 2.13                                                               | <i>transmembrane protein 87A</i>                                              | Negative regulation of phosphatase activity Inferred from sequence or structural similarity           |
| 53  | 12826     | <i>Col4a1</i>              | 2.1                                                                | <i>collagen, type IV, alpha 1</i>                                             | Major structural component of glomerular basement membranes                                           |
| 54  | 77254     | <i>Yif1b</i>               | 2.09                                                               | <i>Yip1 interacting factor homolog B (S. cerevisiae)</i>                      | Unknown                                                                                               |
| 55  | 21849     | <i>Trim28</i>              | 2.08                                                               | <i>Tripartite motif-containing 28</i>                                         | Nuclear corepressor for KRAB domain-containing zinc finger proteins (KRAB-ZFPs)                       |
| 56  | 20856     | <i>Stc2</i>                | 2.06                                                               | <i>Stanniocalcin 2</i>                                                        | Has an anti-hypocalcemic action on calcium and phosphate homeostasis                                  |
| 57  | 56212     | <i>Rhog</i>                | 2.06                                                               | <i>Ras homolog gene family, member G</i>                                      | Required for the formation of membrane ruffles during macropinocytosis                                |
| 58  | 230766    | <i>Bc030183</i>            | 2.06                                                               | <i>Family with sequence similarity 167, member B</i>                          | Unknown                                                                                               |
| 59  | 320634    | <i>9530014D17Rik</i>       | 2.06                                                               | <i>Oculocerebrorenal syndrome of Lowe</i>                                     | Unknown                                                                                               |
| 60  | 192191    | <i>Med9</i>                | 2.05                                                               | <i>Mediator of RNA polymerase II transcription, subunit 9 homolog (yeast)</i> | A coactivator involved in the regulated transcription of nearly all RNA polymerase II-dependent genes |
| 61  | 14230     | <i>Fkbp10</i>              | 2.04                                                               | <i>FK506 binding protein 10</i>                                               | PPIases accelerate the folding of proteins during protein synthesis                                   |
| 62  | 16010     | <i>Igfbp4</i>              | 2.03                                                               | <i>Insulin-like growth factor binding protein 4</i>                           | Either inhibit or stimulate the growth promoting effects of the IGFs on cell culture                  |
| 63  | 100113398 | <i>A430024h01Rik/Adat3</i> | 2.03                                                               | <i>Adenosine deaminase, tRNA-specific 3, TAD2 homolog (S. cerevisiae)</i>     | May be involved in deamination of adenosine-34 to inosine in many tRNAs as a regulatory subunit       |
| 64  | 385063    | <i>LOC385063</i>           | 2.03                                                               | <i>Hippocalcin-like protein 1-like</i>                                        | Unknown                                                                                               |
| 65  | 66839     | <i>0610009O20Rik</i>       | 2.02                                                               | <i>RIKEN cDNA 0610009O20 gene</i>                                             | Unknown                                                                                               |

Table S4. Cont.

| No. | Gene ID | Gene Symbol   | E12.5 Proximal/E13.5<br>Metacarpal-Phalange<br>Ratio of Expression | Gene Name                                                                    | Function                                                                                                    |
|-----|---------|---------------|--------------------------------------------------------------------|------------------------------------------------------------------------------|-------------------------------------------------------------------------------------------------------------|
| 66  | 72357   | 2210016L21Rik | 2.02                                                               | RIKEN cDNA 2210016L21 gene                                                   | Unknown                                                                                                     |
| 67  | 72238   | Tbc1d5        | 2.01                                                               | TBC1 domain family, member 5                                                 | May act as a GTPase-activating protein for Rab family protein(s)                                            |
| 68  | 108657  | Rnpepl1       | 2.01                                                               | Arginyl aminopeptidase (aminopeptidase B)-like 1                             | Unknown                                                                                                     |
| 69  | 11461   | Actb          | 2                                                                  | Actin, beta                                                                  | Highly conserved proteins that are involved in various types of cell motility                               |
| 70  | 13384   | Mpp3          | 0.49                                                               | Membrane protein, palmitoylated 3<br>(MAGUK p55 subfamily member 3)          | Unknown                                                                                                     |
| 71  | 14734   | Gpc3          | 0.48                                                               | Gypican 3                                                                    | GPC3 acts as a negative regulator of Hedgehog signaling during mammalian development                        |
| 72  | 230726  | Rhbdl2        | 0.48                                                               | Rhomboid, veinlet-like 2 (Drosophila)                                        | Intramembrane proteolysis and the subsequent release of functional polypeptides from their membrane anchors |
| 73  | 15980   | Ifngr2        | 0.47                                                               | Interferon gamma receptor 2                                                  | A pleiotropic cytokine that plays an important role in many inflammatory processes                          |
| 74  | 54419   | Cldn6         | 0.47                                                               | Claudin 6                                                                    | Plays a major role in tight junction-specific obliteration of the intercellular space                       |
| 75  | 668171  | Zxda          | 0.47                                                               | zinc finger, X-linked, duplicated A                                          | Cooperates with CIITA to promote transcription of MHC class I and MHC class II genes                        |
| 76  | 109129  | 2010311D03Rik | 0.46                                                               | Methylmalonic aciduria (cobalamin deficiency) cblD type, with homocystinuria | During organogenesis Mmache and Mmadhc may interact in only a subset of cells                               |
| 77  | 54367   | Zfp326        | 0.45                                                               | Zinc finger protein 326                                                      | Integrates transcript elongation with the regulation of alternative splicing                                |
| 78  | 16876   | Lhx9          | 0.44                                                               | LIM homeobox protein 9                                                       | Gonadal development                                                                                         |
| 79  | 66286   | Sec11c        | 0.41                                                               | SEC11 homolog C (S. cerevisiae)                                              | Removes signal peptides from nascent proteins as they are translocated into the lumen of the ER             |

Table S4. Cont.

| No. | Gene ID   | Gene Symbol         | E12.5 Proximal/E13.5<br>Metacarpal-Phalange<br>Ratio of Expression | Gene Name                                        | Function                                                                                                                    |
|-----|-----------|---------------------|--------------------------------------------------------------------|--------------------------------------------------|-----------------------------------------------------------------------------------------------------------------------------|
| 80  | 319158    | <i>Hist1h4i</i>     | 0.41                                                               | <i>Histone cluster 1, H4i</i>                    | Core component of nucleosome. Nucleosomes wrap and compact DNA into chromatin                                               |
| 81  | 17972     | <i>Ncf4</i>         | 0.4                                                                | <i>Neutrophil cytosolic factor 4</i>             | Component of the NADPH-oxidase                                                                                              |
| 82  | 244710    | <i>LOC244710</i>    | 0.4                                                                | <i>Predicted gene 4977</i>                       | Unknown Function                                                                                                            |
| 83  | 59003     | <i>Maea</i>         | 0.39                                                               | <i>Macrophage erythroblast attacher</i>          | Plays a role in erythroblast enucleation and in the development of the mature macrophages                                   |
| 84  | 270665    | <i>LOC270665</i>    | 0.39                                                               | <i>Predicted gene 5060</i>                       | Unknown                                                                                                                     |
| 85  | 26450     | <i>Rbbp9</i>        | 0.37                                                               | <i>Retinoblastoma binding protein 9</i>          | RBBP9 is expression inversely correlated with RB phosphorylation                                                            |
| 86  | 17709     | <i>Mt-co2</i>       | 0.36                                                               | <i>Cytochrome c oxidase subunit II</i>           | Cytochrome c oxidase is the component of the respiratory chain. Subunit 2 transfers the electrons from cytochrome c         |
| 87  | 55936     | <i>Ctps2</i>        | 0.3                                                                | <i>Cytidine 5'-triphosphate synthase 2</i>       | Constitutes the rate-limiting enzyme in the synthesis of cytosine nucleotides                                               |
| 88  | 100715    | <i>Papd4</i>        | 0.28                                                               | <i>PAP associated domain containing 4</i>        | Cytoplasmic poly(A) RNA polymerase that adds successive AMP monomers to the 3'-end of specific RNAs, forming a poly(A) tail |
| 89  | 15387     | <i>Hnrpk</i>        | 0.23                                                               | <i>Heterogeneous nuclear ribonucleoprotein K</i> | . Binds tenaciously to poly(C) sequences. Likely to play a role in the nuclear metabolism of hnRNAs                         |
| 90  | 11806     | <i>Apoa1</i>        | 0.22                                                               | <i>Apolipoprotein A-I</i>                        | Participates in the reverse transport of cholesterol from tissues to the liver for excretion                                |
| 91  | 100040413 | <i>LOC100040413</i> | 0.19                                                               | <i>Predicted gene 10075</i>                      | Unknown                                                                                                                     |
